# Supplementary material
Source: Research Square preprint supplement (doi:10.21203/rs.3.rs-9200680/v1)
Supplement: Supplementary file 1 [file f8eb67953633e4d2f83bb804.docx]

***Appendix 1.*** Prompts used for various phases of the LLM-assistet content analysis.

| **Purpose** | **Prompt** |
| --- | --- |
| Set context and establish shared understanding before a complex analytical task. | Hello, I need your help with conducting a content analysis of social media posts related to hormonal contraception.  The material to be analyzed is contained in 60 files that I will upload (.docx files). Each file includes a textual transcript of a social media post (that is, a video or an image), as well as a table with engagement metrics from the post from which the content originates. The posts come from three platforms: Instagram, TikTok, and YouTube.  First, I will explain the structure of each file and the different types of data they contain, and then I will explain what I expect from you regarding the analysis. After that, I will send you all the files. |
| Define the document structure and annotation rules so the AI can accurately parse, interpret, and consistently analyze each transcript and its associated metadata. | Each transcript is presented as a single text document that contains the following elements:   1. At the very beginning, a table with post metrics consisting of 10 columns:  - id – identification number - file – name of the file representing the content - network – the platform from which the post originates - views – number of views - likes – number of likes - comments – number of comments - saved – number of times the post was saved - shares – number of shares - doctor – whether a doctor participated in creating the post - pharmacist – whether a pharmacist participated in creating the post   All of these data will be needed later for subsequent analyses following the current one, so please keep them in mind.   1. The text representing the transcript of the video or image from the original content. 2. If more than one person speaks in the transcribed video, the speaker of each segment is indicated in square brackets [ ] (e.g., [doctor], [journalist], [girl], [pharmacist], etc.). 3. If there is on-screen text or graphical text appearing during the video, the text displayed is shown in curly brackets { }, positioned within the transcript according to the moment it appears in the video. 4. At the end of the document, the post description (if available) is provided between dollar signs $ $. |
| Provide the transcripts for the analysis. | First, I will send you the files, 60 in total. I have explained how each of them is structured and what they contain. Once I send them, review them and let me know whether it is clear what I have provided. Then I will give you instructions for the analysis we need to conduct. |
| Clearly define the analytical task and methodology of inductive coding, and ensure the AI confirms understanding before proceeding. | We need to conduct a content analysis of the entire dataset consisting of 60 files. I want you to read all of them as many times as necessary and, through inductive coding, generate narrative codes from the dataset and record their frequencies of occurrence. Do not begin yet; first, confirm that you understand what is required. After that, I will provide detailed instructions on how I want the results to be presented. |
| Specify the required format, level of detail, and structure for presenting the results of the content analysis, while ensuring the AI confirms understanding before beginning. | Alright, you understand what needs to be done. I need you to present the results in the following way:   1. First, present the codes you identified and their frequencies. Each code should be clearly described but not too briefly, meaning it should be explained in one full sentence rather than just one or two words. In addition, for each code, you need to list every file in which it appears and provide a quotation from each file that you used to form the code. 2. Also create a table. The table should include all codes and the names of all files in which they appear, grouped by social media platform.   Do not start yet; first, confirm that you understand the instructions. |
| Instruct the AI to apply a predefined set of deductive codes to the entire dataset, calculate their frequencies, and present the results using the same structured format as before, after confirming understanding. | I would also like you to do the following: go through the entire dataset again, but this time identify the frequencies of the codes that I am providing, and then present everything in the same way as before.  Codes:   1. Positive attitude toward hormonal contraception 2. Negative attitude toward hormonal contraception 3. Positive attitude toward the authority of healthcare professionals 4. Negative attitude toward the authority of healthcare professionals 5. Contraceptive pill as the main topic 6. Emergency contraceptive pill as the main topic 7. Intrauterine device (IUD) as the main topic   Do not start yet; first, confirm that you understand the instructions. |
